# Supplementary material for: Microstructural and Mechanical Analysis of Seamless Pipes Made of Superaustenitic Stainless Steel Using Cross-Roll Piercing and Elongation
Source: MDPI journal article supplement (doi:10.3390/jmmp7050185), 2023-10-14
Supplement: s1 [file s1]

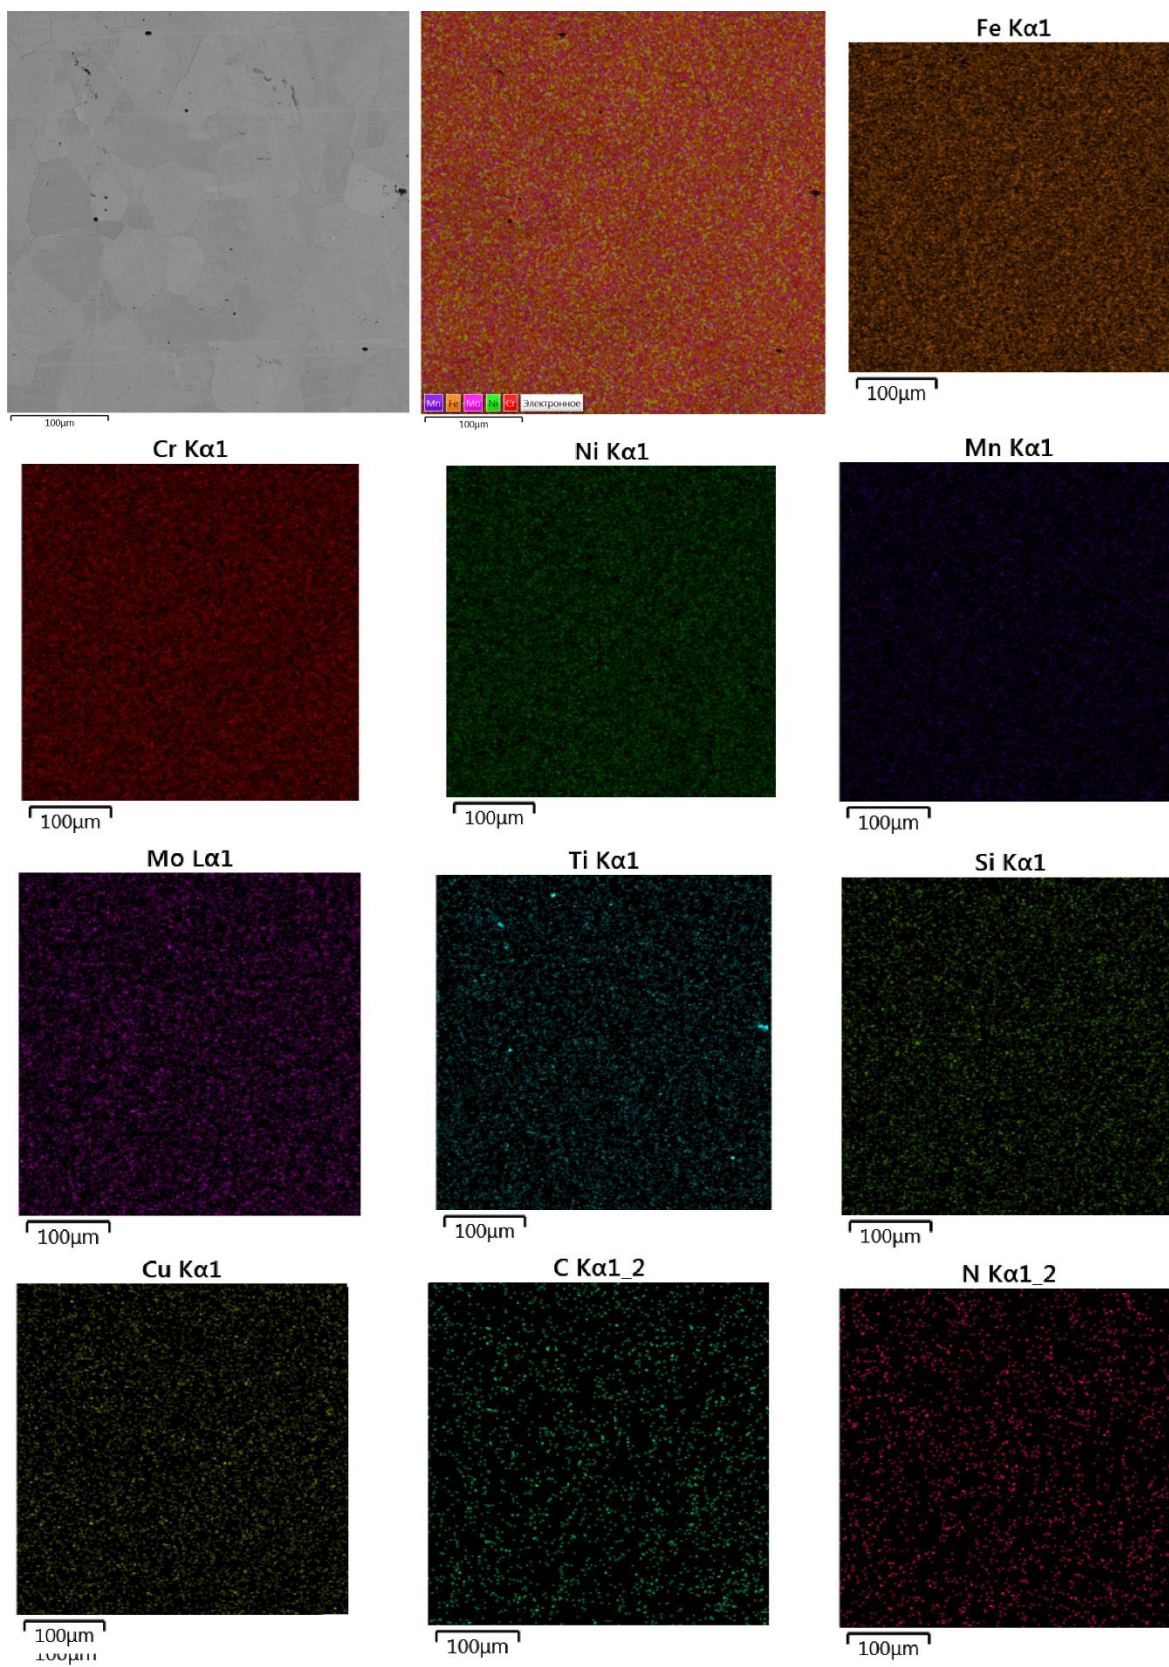

**Fig. 1.** EDS analysis map from internal part of pierced tube



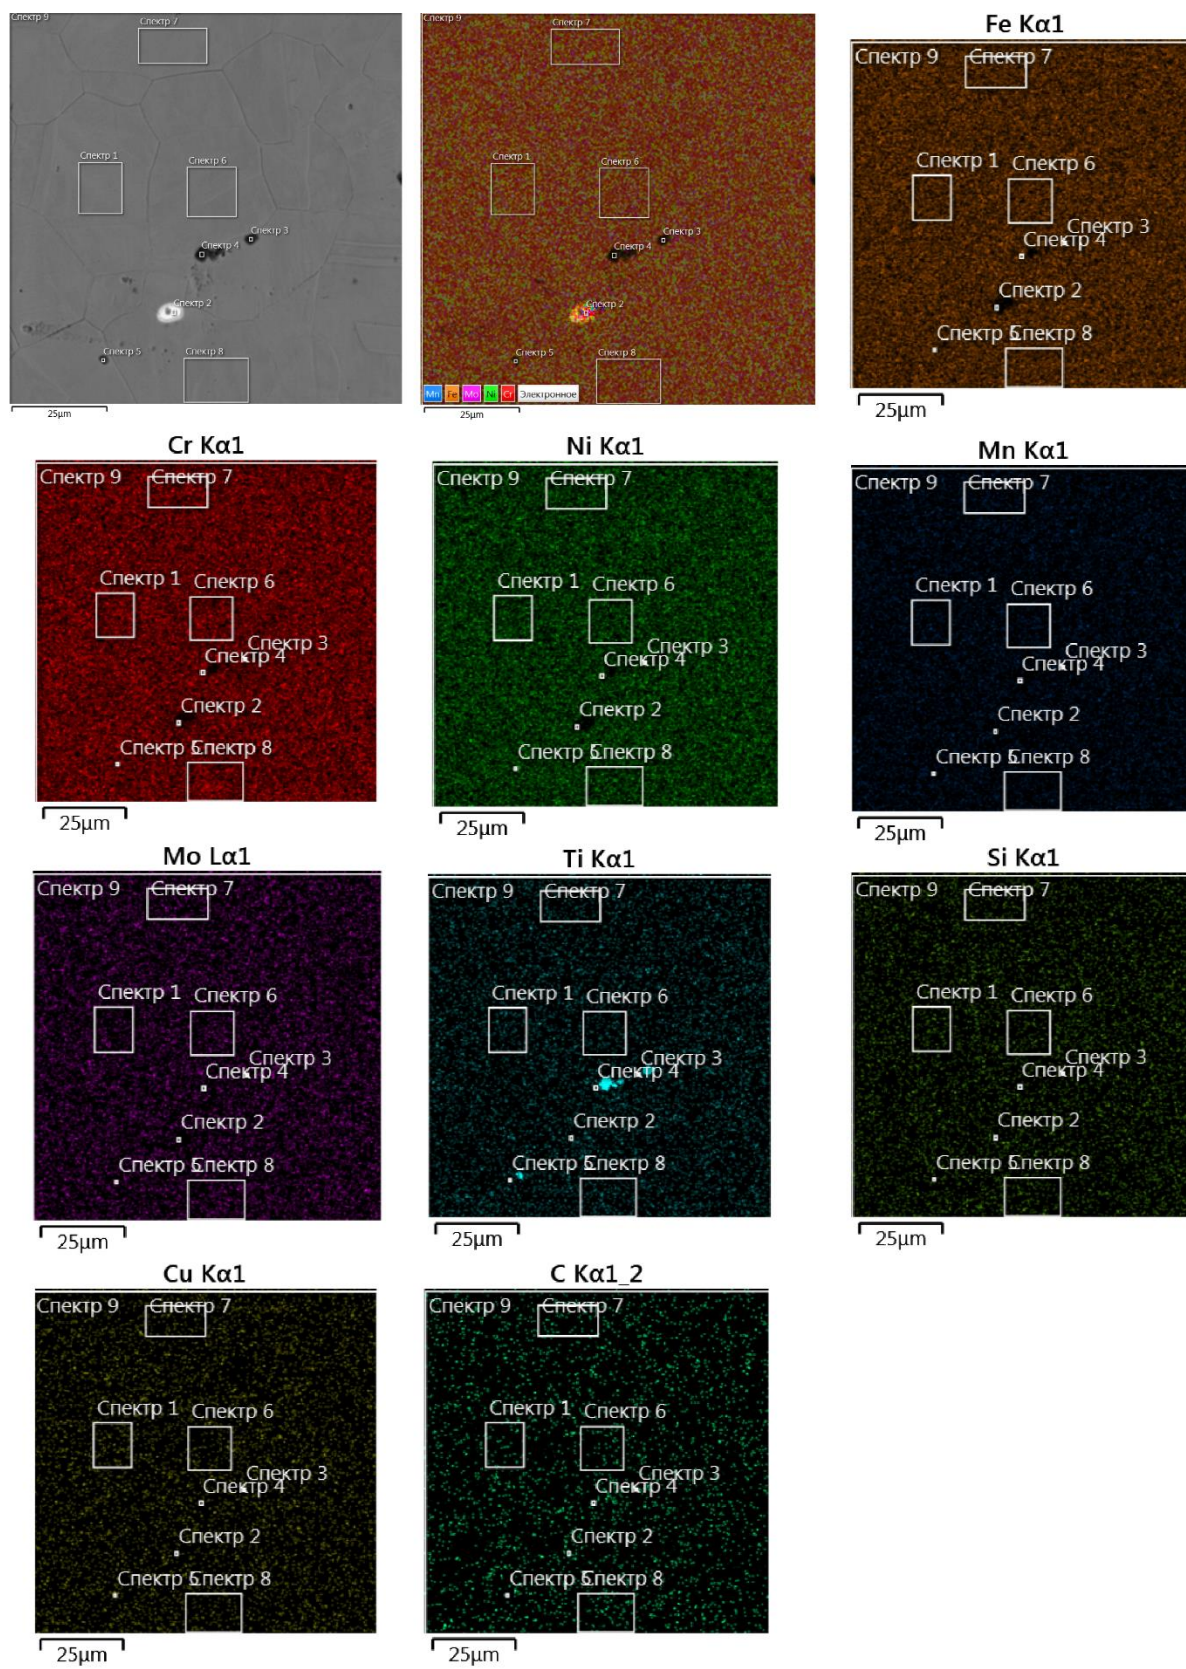

**Fig. 2.** EDS analysis map from external part of pierced tube

**Table 1.** EDS results element analysis from Internal area of pierced tube

| Element | Weight. % | Atom. % |
|---------|-----------|---------|
| Cr      | 23.19     | 24.95   |
| Ni      | 25.57     | 24.36   |
| Ti      | 0.70      | 0.82    |
| Mo      | 2.80      | 1.63    |
| Cu      | 2.52      | 2.22    |
| Fe      | 43.81     | 43.88   |
| Si      | 0.58      | 1.15    |
| Mn      | 0.70      | 0.72    |
| Al      | 0.13      | 0.26    |
| Total   | 100       | 100     |

**Table 2.** EDS results element analysis from external area of pierced tube

| Element | Weight. % | Atom. % |
|---------|-----------|---------|
| Cr      | 23.19     | 24.95   |
| Ni      | 25.57     | 24.36   |
| Ti      | 0.79      | 0.82    |
| Mo      | 2.87      | 1.63    |
| Cu      | 2.76      | 2.22    |
| Fe      | 43.41     | 43.88   |
| Si      | 0.82      | 1.15    |
| Mn      | 0.58      | 0.72    |
| Total   | 100       | 100     |



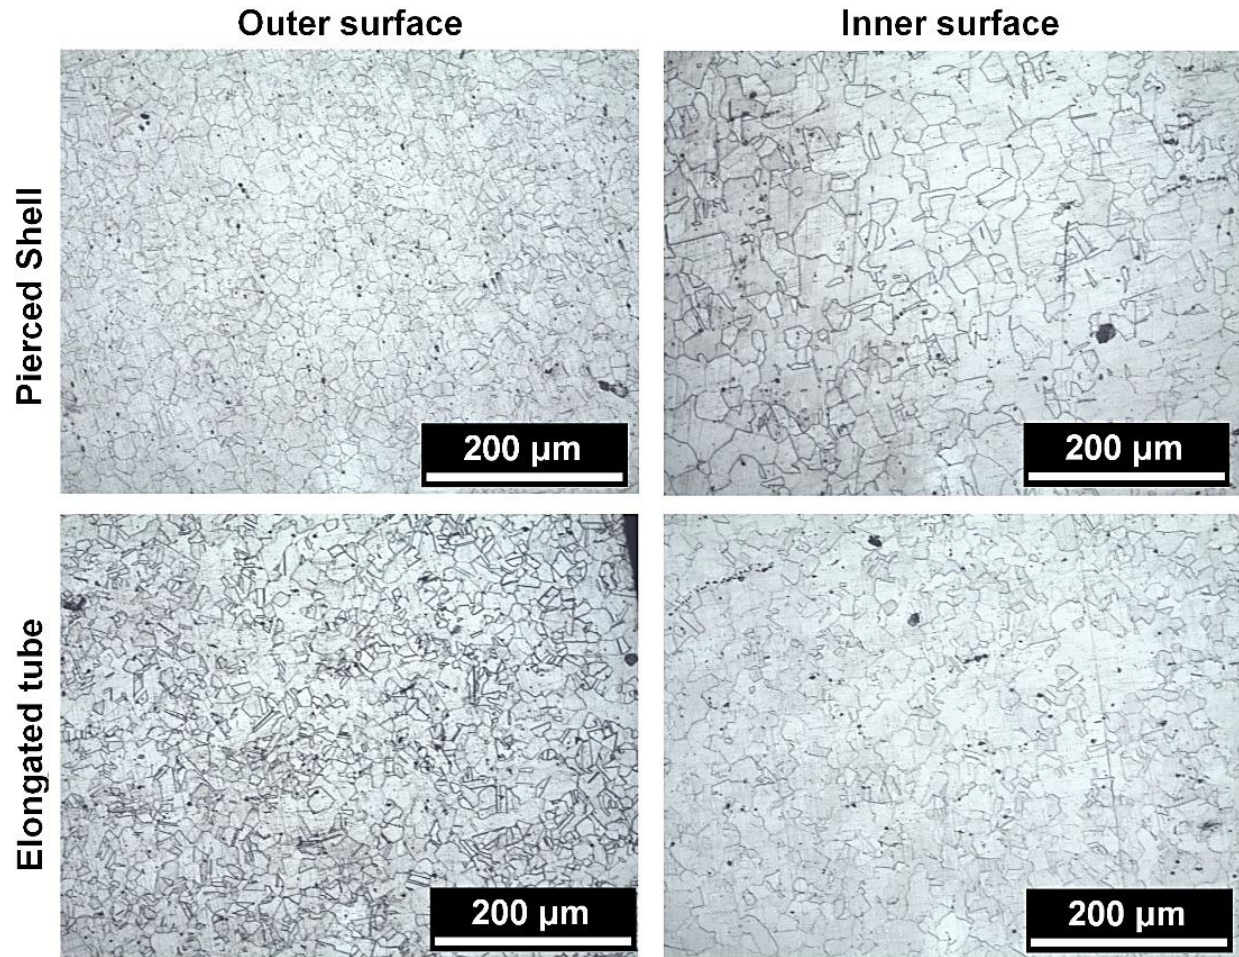

**Fig. 3.** Optic microstructure of samples, longitudinal section

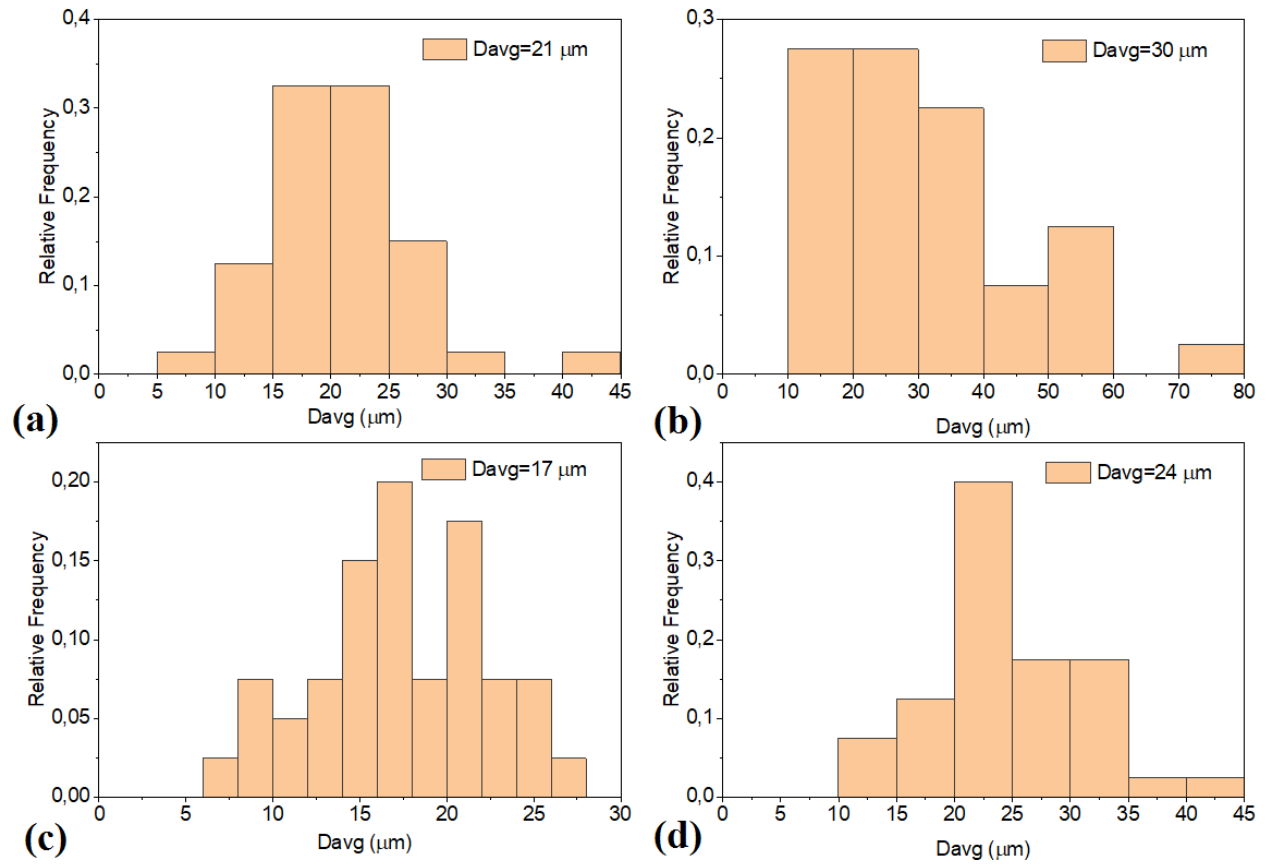

**Fig. 4.** Histograms of average grain size distribution within the longitudinal section for (a) external surface, and (b) internal surface of pierced shell. Histograms of average grain size distribution within the longitudinal section for (c) external surface, and (d) internal surface of elongated pipe.



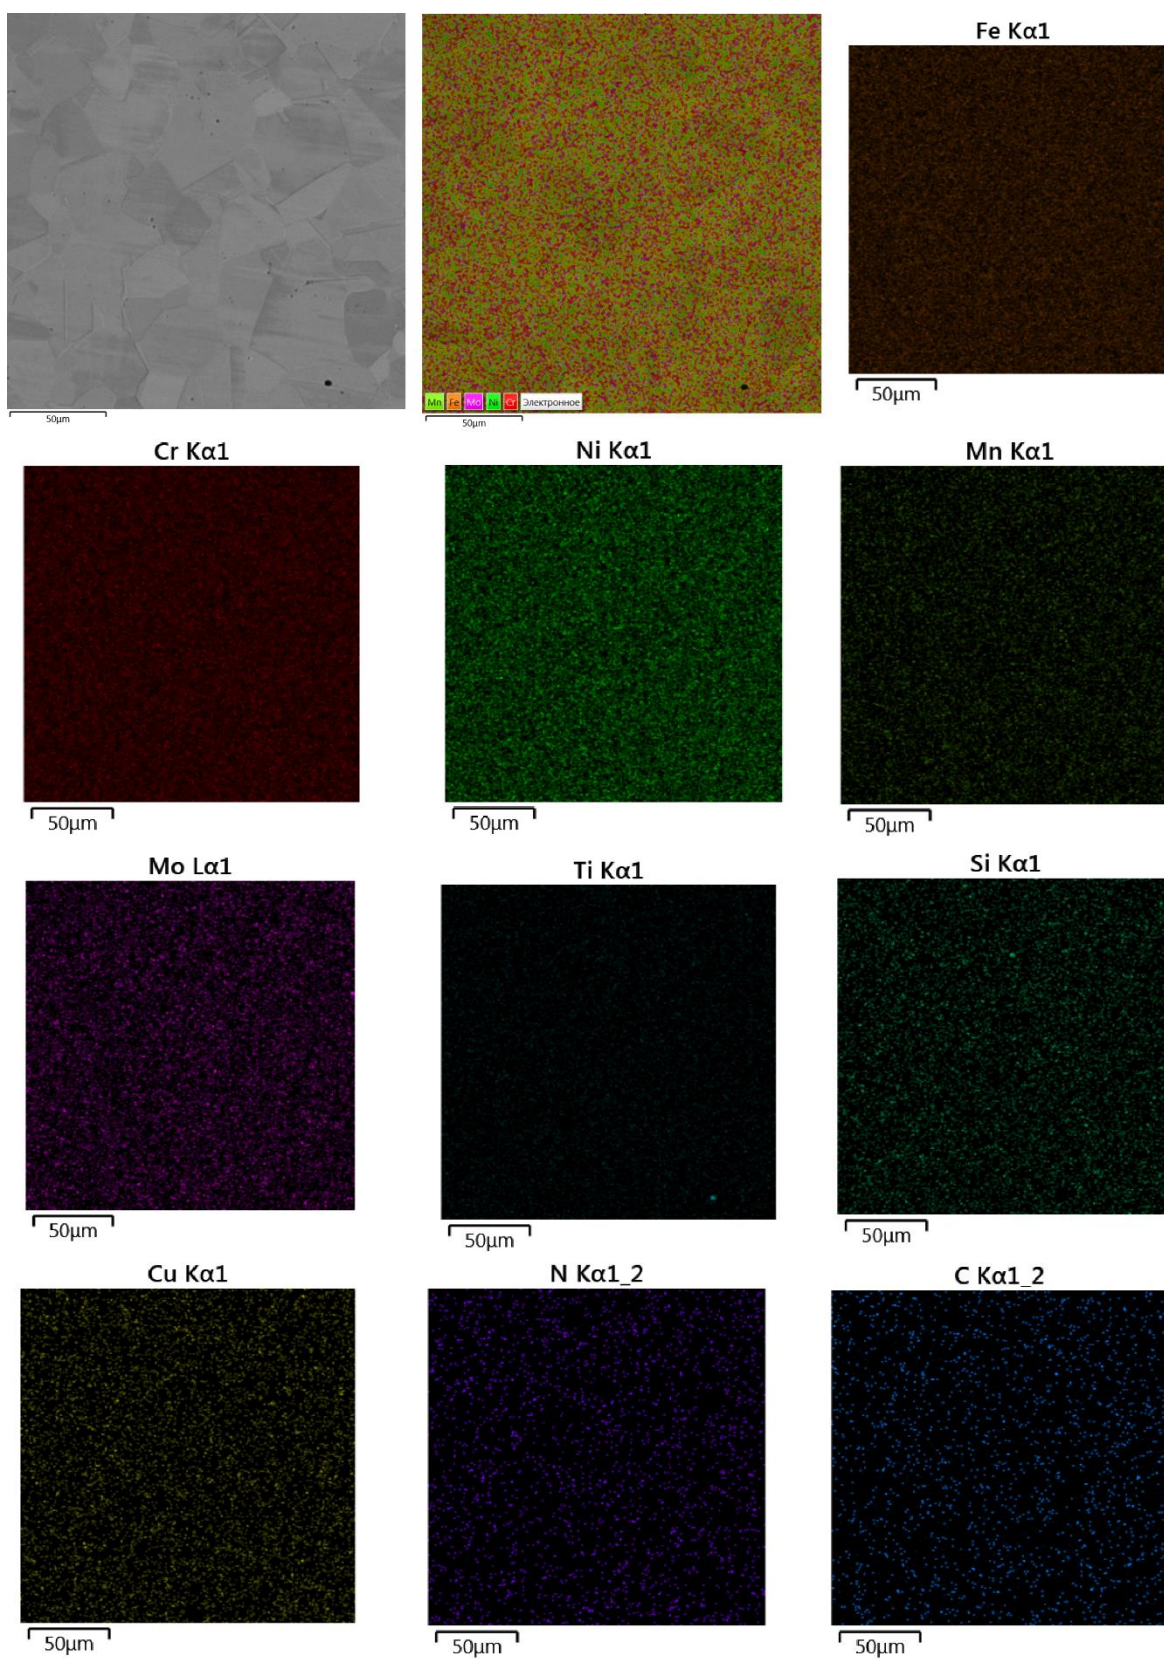

**Fig. 5.** EDS analysis map from internal part of elongated tube



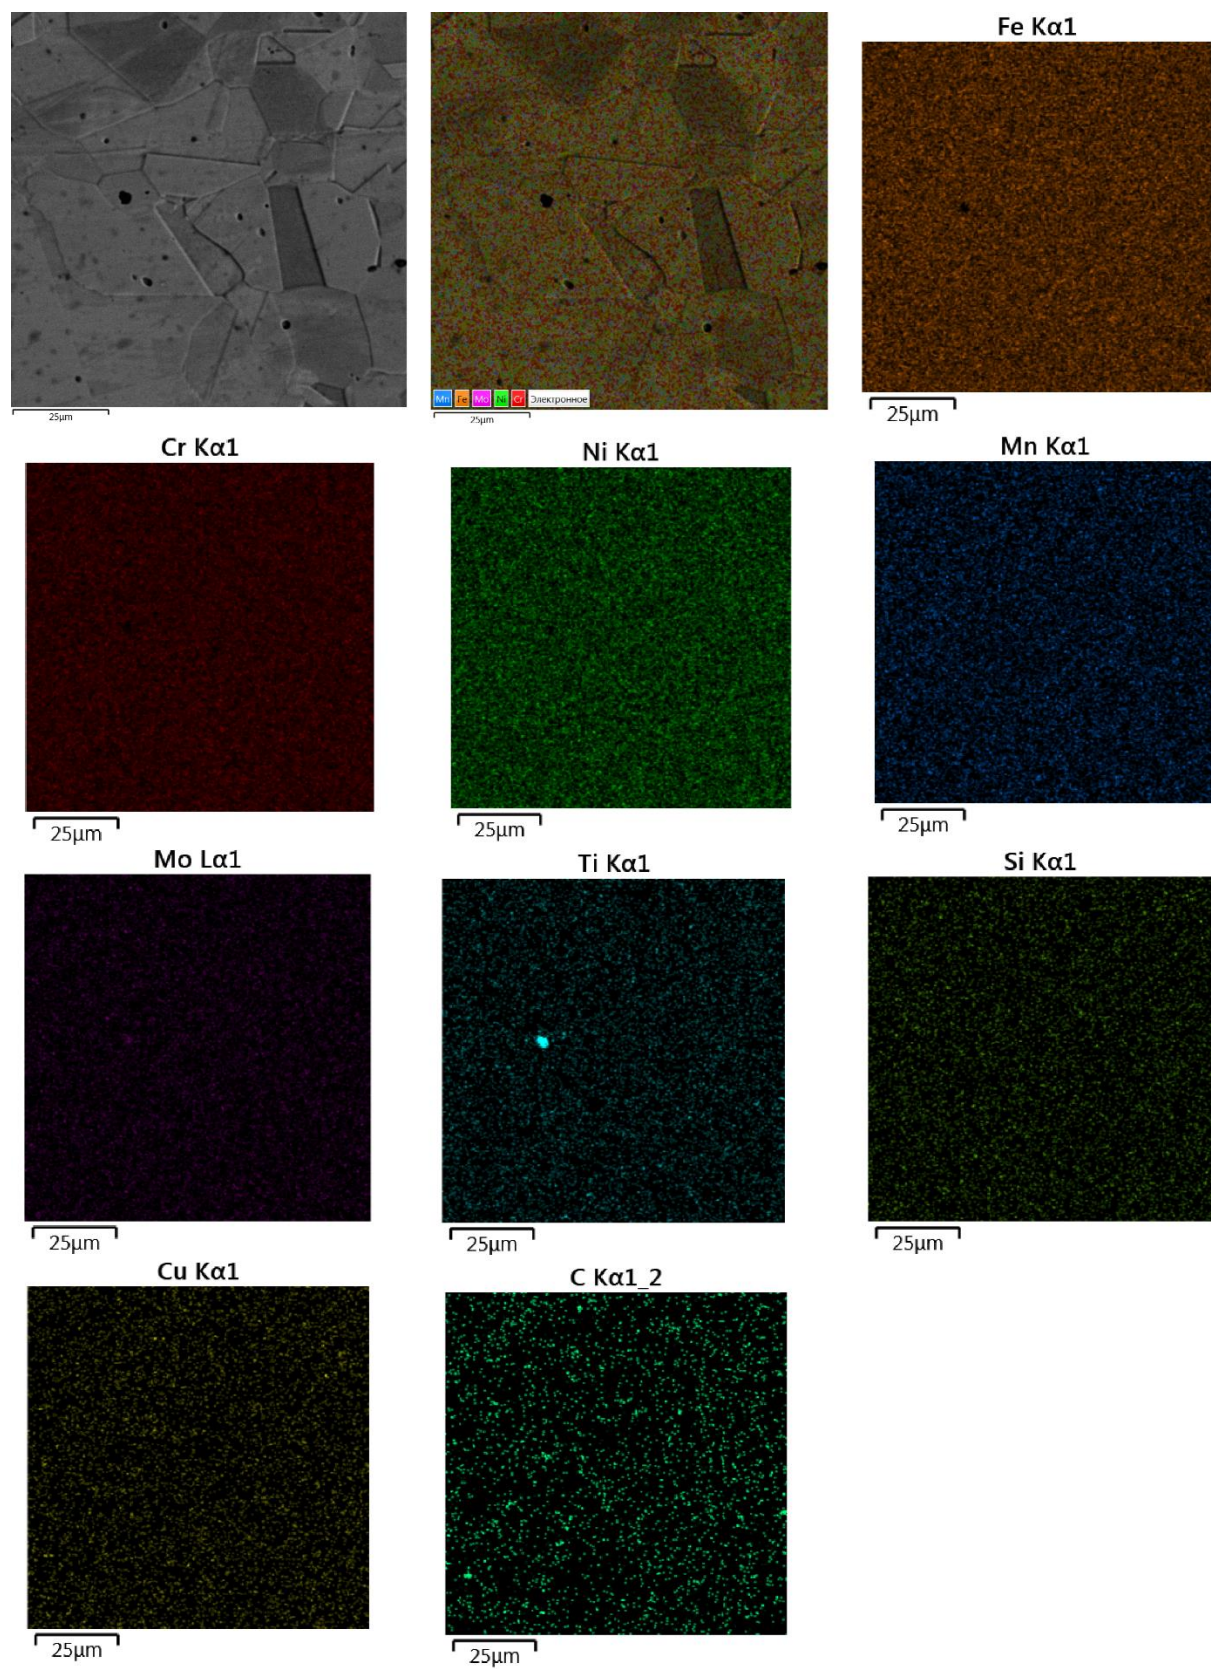

**Fig. 6.** EDS analysis map from external part of elongated tube

**Table 3.** EDS results element analysis from internal area of elongated tube

| Element | Weight. % | Atom. % |
|---------|-----------|---------|
| Cr      | 23.25     | 25.06   |
| Ni      | 25.82     | 24.66   |
| Ti      | 0.68      | 0.79    |
| Mo      | 2.89      | 1.69    |
| Cu      | 2.72      | 2.40    |
| Fe      | 43.32     | 43.48   |
| Si      | 0.59      | 1.17    |
| Mn      | 0.74      | 0.75    |
| Total   | 100       | 100     |

**Table 4.** EDS results element analysis from external area of elongated tube

| Element | Weight. % | Atom. % |
|---------|-----------|---------|
| Cr      | 23.17     | 24.97   |
| Ni      | 25.69     | 24.52   |
| Ti      | 0.68      | 0.80    |
| Mo      | 2.83      | 1.65    |
| Cu      | 2.60      | 2.29    |
| Fe      | 43.62     | 43.77   |
| Si      | 0.57      | 1.14    |
| Mn      | 0.85      | 0.86    |
| Total   | 100       | 100     |
